# Supplementary material
Source: PubMed Central journal article supplement (PMC2717871)

Fig S1

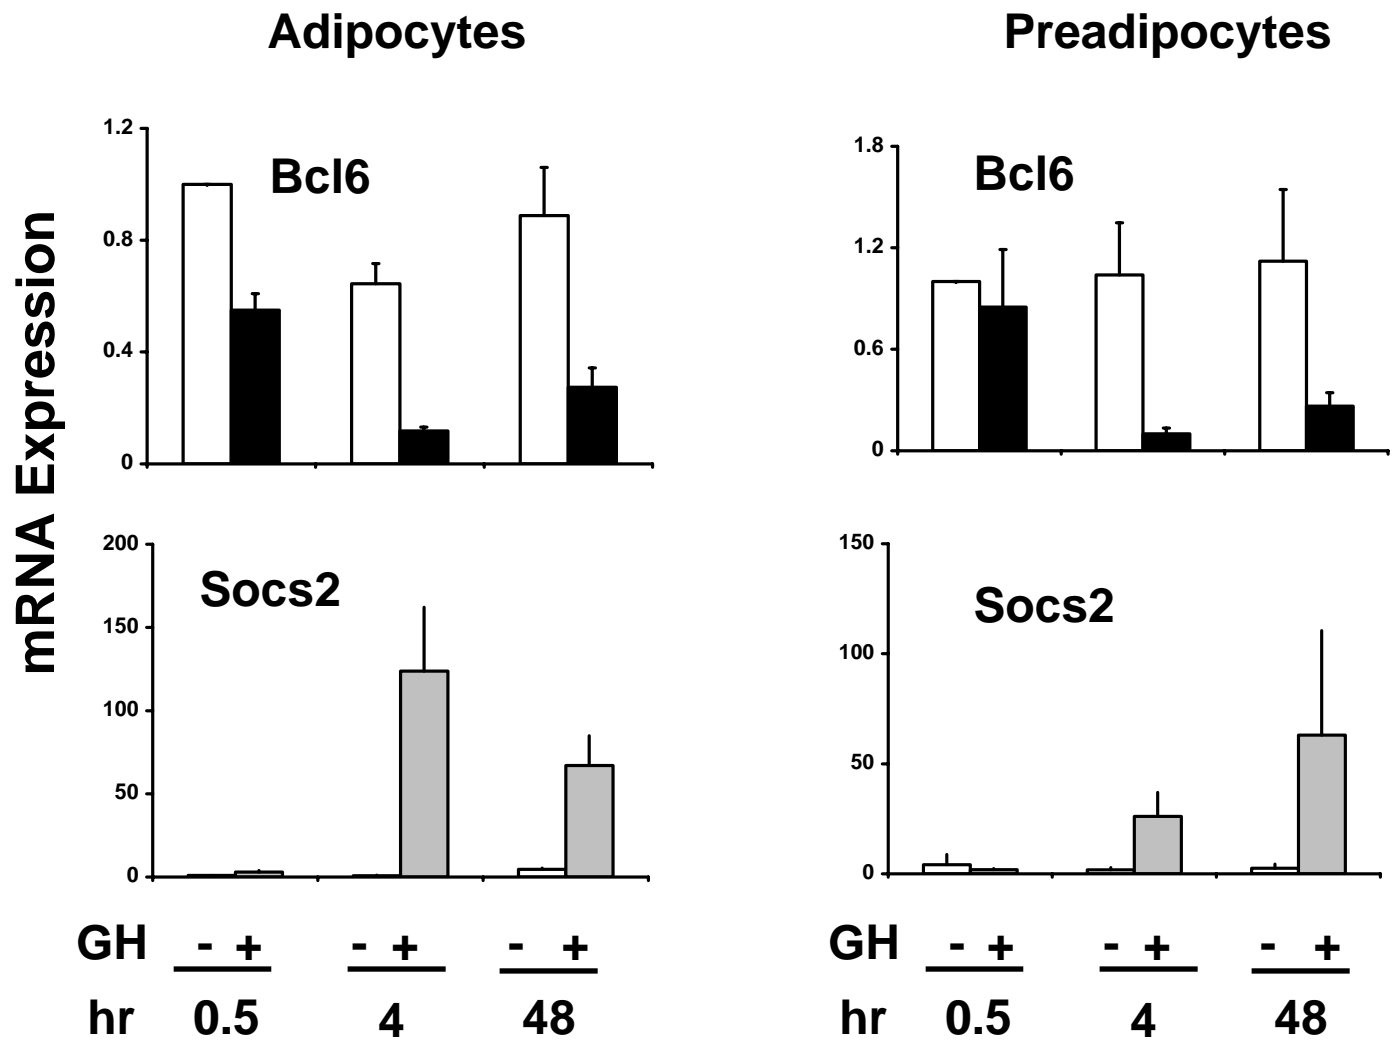

Supplement: en.2009-0212_1.pdf [file en.2009-0212_1.pdf]

Fig S2

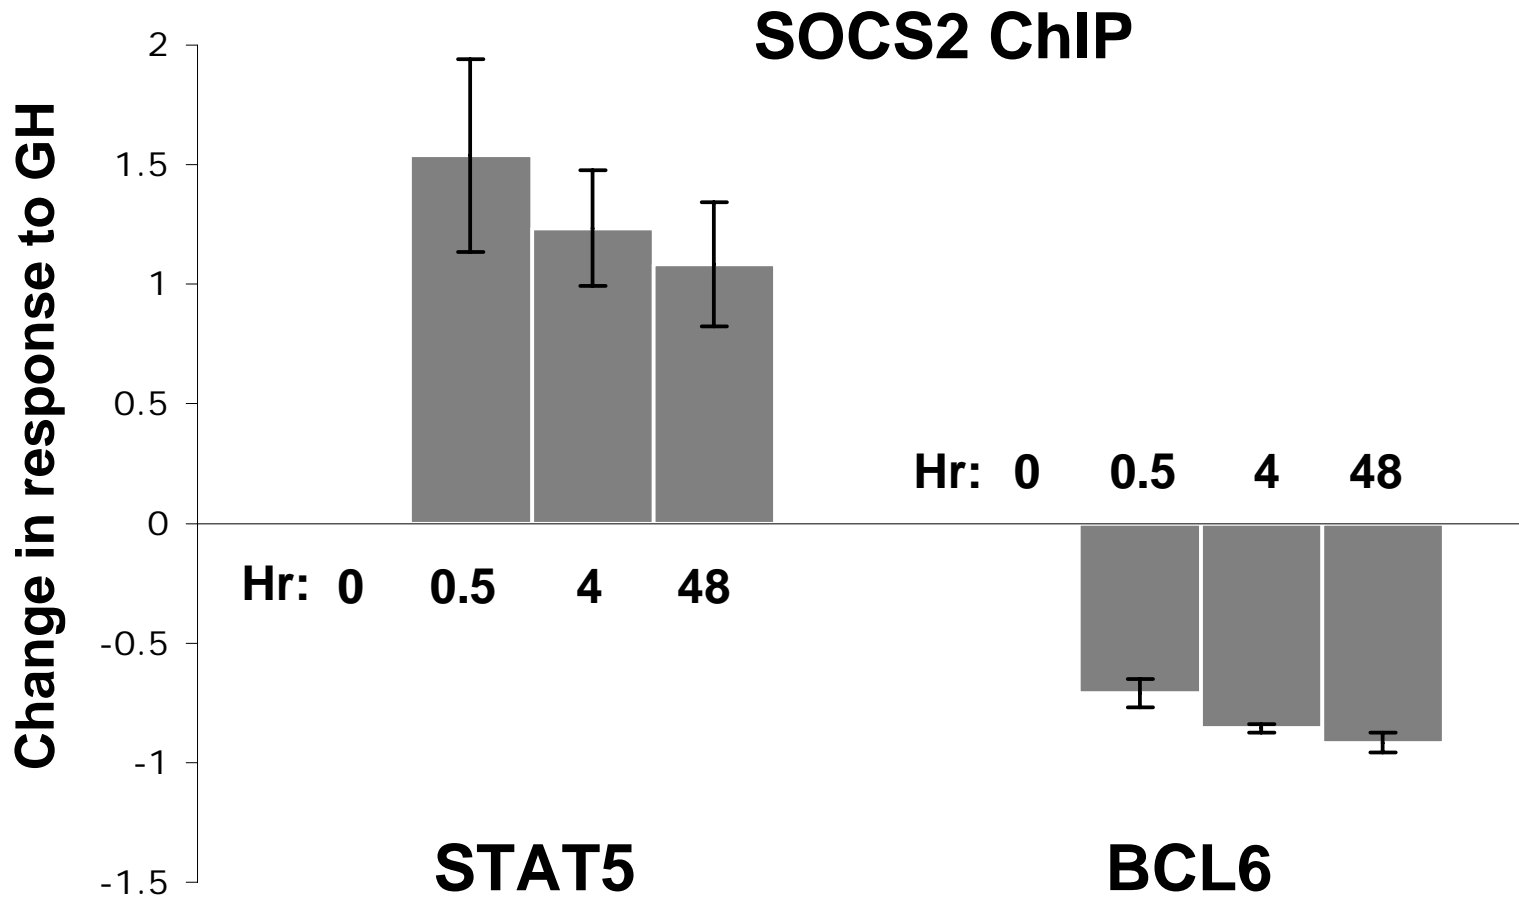

Supplement: en.2009-0212_2.pdf [file en.2009-0212_2.pdf]
